# Supplementary material for: Real-World Results of Ocrelizumab Treatment for Primary Progressive Multiple Sclerosis
Source: Hindawi journal article supplement (doi:10.1155/2020/5463451), 2020-06-15
Supplement: f1 [file 5463451.f1.pdf]

**Supplemental table 1.** Eligibility of real-world population in St. Antonius Hospital (n = 21) to ORATORIO clinical trial; separated for each eligibility criteria<sup>a</sup>

|                                                                                             | Number of patients eligible (%) |
|---------------------------------------------------------------------------------------------|---------------------------------|
| Age 18-55 years                                                                             | 15 (71.4)                       |
| EDSS score of 3.0 to 6.5 at baseline                                                        | 21 (100)                        |
| Pyramidal functions component of the functional systems Scale of $\geq 2$                   | 21 (100)                        |
| Time since first MS symptoms $\leq 15$ years (EDSS $> 5.0$ at baseline)                     | 21 (100)                        |
| Time since first MS symptoms $\leq 10$ years (EDSS $\leq 5.0$ at baseline)                  | 19 (90.5)                       |
| History of elevated IgG index or $\geq 1$ IgG oligoclonal band in cerebrospinal fluid.      | 21 (100)                        |
| No History of RRMS, SPMS or PRMS                                                            | 20 (95.2)                       |
| No contraindication to MRI                                                                  | 21 (100)                        |
| No side effects from oral or intravenous glucocorticoids                                    | 21 (100)                        |
| No previous treatment with B-cell-targeted therapies or other immunosuppressive medications | 20 (95.2)                       |

<sup>a</sup>ORATORIO eligibility criteria consisted of seven inclusion criteria and four exclusion criteria<sup>12</sup>
